# Supplementary material
Source: PubMed Central journal article supplement (PMC7334336)
Supplement: 13205_2020_2324_MOESM1_ESM.pdf [file 13205_2020_2324_MOESM1_ESM.pdf]

**Supplementary Table 1.** Fractions obtained by column chromatography of hexanic extracts from each system.

| <b>System</b> | <b>Fraction</b> | <b>acetate:hexane</b> | <b>Volume (mL)</b> |
|---------------|-----------------|-----------------------|--------------------|
| <b>T1</b>     | 1-12            | 90:10                 | 100                |
|               | 13-24           | 80:20                 | 100                |
|               | 25-36           | 70:30                 | 100                |
|               | 37-59           | 60:40                 | 200                |
|               | 60-72           | 50:50                 | 100                |
| <b>T2</b>     | 1-12            | 90:10                 | 100                |
|               | 13-24           | 80:20                 | 100                |
|               | 25-36           | 70:30                 | 100                |
|               | 37-59           | 60:40                 | 200                |
|               | 60-72           | 50:50                 | 100                |
| <b>T3</b>     | 1-12            | 90:10                 | 100                |
|               | 13-24           | 80:20                 | 100                |
|               | 25-36           | 70:30                 | 100                |
|               | 37-59           | 60:40                 | 200                |
|               | 60-72           | 50:50                 | 100                |
